# Supplementary material
Source: publisher site journal article supplement (https://www.dovepress.com/article/251328)
Supplement: Supplementary file 1 [file get_supplementary_file.php]

# Supplementary Material A: COREQ Checklist

| **No. Item** | **Guide questions/description** | **Reported on Page:** |
| --- | --- | --- |
| **Domain 1: Research team and reﬂexivity** | | |
| *Personal Characteristics* | | |
| 1. Interviewer/facilitator | Which author/s conducted the interview or focus group? | Page 4 |
| 2. Credentials | What were the researcher’s credentials? E.g. PhD, MD | Page 1 |
| 3. Occupation | What was their occupation at the time of the study? | Page 5 |
| 4. Gender | Was the researcher male or female? | Page 1 |
| 5. Experience and training | What experience or training did the researcher have? | Page 5 |
| *Relationship with participants* | | |
| 6. Relationship established | Was a relationship established prior to study commencement? | Page 4 |
| 7. Participant knowledge of the interviewer | What did the participants know about the researcher? e.g. personal goals, reasons for doing the research | Page 4 |
| 8. Interviewer characteristics | What characteristics were reported about the interviewer/facilitator? e.g. Bias, assumptions, reasons and interests in the research topic | Page 5 |

| **Domain 2: Study design** | | |
| --- | --- | --- |
| *Theoretical framework* | | |
| 9. Methodological orientation and Theory | What methodological orientation was stated to underpin the study? e.g. grounded theory, discourse analysis, ethnography, phenomenology, content analysis | Page 5 |
| *Participant selection* | | |
| 10. Sampling | How were participants selected? e.g. purposive, convenience, consecutive, snowball | Page 4 |
| 11. Method of approach | How were participants approached? e.g. face-to-face, telephone, mail, email | Page 4 |
| 12. Sample size | How many participants were in the study? | Page 5 |
| 13. Non-participation | How many people refused to participate or dropped out? Reasons? | Page 5 |
| *Setting* | | |
| 14. Setting of data collection | Where was the data collected? e.g. home, clinic, workplace | Page 4 |
| 15. Presence of non-participants | Was anyone else present besides the participants and researchers? | Page 5 Inferred as one-to-one interviews |
| 16. Description of sample | What are the important characteristics of the sample? e.g. demographic data | Page 5 |
| *Data collection* | | |
| 17. Interview guide | Were questions, prompts, guides provided by the authors? Was it pilot tested? | Supplementary material B, page 15 |
| 18. Repeat interviews | Were repeat interviews carried out? If yes, how many? | Page 4 & 5 |
| 19. Audio/visual recording | Did the research use audio or visual recording to collect the data? | Page 4 |
| 20. Field notes | Were ﬁeld notes made during and/or after the interview or focus group? | Page 5 |
| 21. Duration | What was the duration of the interviews or focus group? | Page 5 |
| 22. Data saturation | Was data saturation discussed? | Page 9 |
| 23. Transcripts returned | Were transcripts returned to participants for comment and/or correction? | No, Inferred |
|  | | |
| **Domain 3: analysis and ﬁndings** | | |
| *Data analysis* | | |
| 24. Number of data coders | How many data coders coded the data? | Page 5 |
| 25. Description of the coding tree | Did authors provide a description of the coding tree? | Supplementary Material C, page 16 |
| 26. Derivation of themes | Were themes identiﬁed in advance or derived from the data? | Page 5 |
| 27. Software | What software, if applicable, was used to manage the data? | Page 5 |
| 28. Participant checking | Did participants provide feedback on the ﬁndings? | No, inferred |
| *Reporting* | | |
| 29. Quotations presented | Were participant quotations presented to illustrate the themes/ﬁndings? Was each quotation identiﬁed? e.g. participant number | Page 6-8 |
| 30. Data and ﬁndings consistent | Was there consistency between the data presented and the ﬁndings? | Page 8 onwards |
| 31. Clarity of major themes | Were major themes clearly presented in the ﬁndings? | From page 8 |
| 32. Clarity of minor themes | Is there a description of diverse cases or discussion of minor themes? | Discussion of major and minor themes  From page 8 |

# Supplementary Material B: Interview Schedule for patients

**Introduction**

Researcher introduces themselves and outlines the aims of the project.

Allows the participant to introduce themselves.

**Part One: Background to admission**

Can you tell me about the lead up to your admission at *Name* Stroke Unit?

What type of symptoms did you experience?

How were you admitted to the hospital? Were you referred from another hospital, for example, or did you arrive by ambulance?

How did you feel at the time of your admission?

**Part Two: History and experience of symptoms**

Can you tell me about your symptoms? How long have you experienced these symptoms? Is this the first time you have experienced such symptoms or has this happened before?

Have you had previous treatment or is this the first time?

Do these symptoms affect your day-to-day living, and if so, how?

Did you (or do you) take any measures to prevent these symptoms – for example through treatment or in your day-to-day life?

**Part Three: Illness beliefs and attitudes**

Are these symptoms something you feel you can or might be able to control or do you feel they beyond your control?

How did you feel when you first experienced these symptoms? How do you feel now? If there is a difference, what do you think contributed to that difference?

What did the doctors on the ward tell you about your symptoms? How do you feel about what they have told you?

Can you think of anything that might help you with these symptoms in the future? Any service or type of care that you feel is not currently offered?

**Part Five: Rounding Up**

Finally, how do you view the future?

Are there any questions you would like to ask me?

Is there anything you have said that you would like to retract or anything that you have not said that you would like to add further?

Thank the participant

# Supplementary Material C: Coding Framework

| Themes | (1) Physical  Symptom experience | (2) Emotional and coping responses | (3) Hospital Experiences | (4) Symptom attributions | (5) Views on the future |
| --- | --- | --- | --- | --- | --- |
| Codes | Symptom onset:  i) Sudden  ii) Insidious | Negative:  i) Anxiety  ii) Panic  iii) Confusion  iv) Numbness  v) Helplessness | Admission:  i) Help-seeking  ii) Arrival  iii) Escalation of care  iv) Imaging  v) Diagnosis  vi) Prioritisation | Understanding of symptom cause:  i) Physical attributions  ii) Psychological attributions  iii) Uncertainty  iv) Other attributions | Lifestyle adaptation |
| Self-monitoring | Relief | Interactions with staff:  i) Information provision  ii) Alternative diagnoses  iii) Diagnosis delivery  iv) Advice  v) Invalidation of experience/time wasting  vi) Empathy | Locus of control/volition | Recovery |
| Symptomatology | Social emotions:  i) Guilt  ii) Shame  iii) Abandonment  iv) Grief | Belief in organic cause | Perceived physical consequences  Symptom Reoccurrence  Catastrophising |
| Co-morbidities/medical history | Emotional expression style | Views on treatment:  i) Appropriateness of care  ii) Psych support or group  iii) Physiotherapy  iv) Medication  v) Discharge/follow-up | Stoicism |
| Persistence v transience | Identity |
| Fatalism |
